# Supplementary material for: Food Literacy and Dietary Intake in German Office Workers: A Longitudinal Intervention Study
Source: MDPI journal article supplement (doi:10.3390/ijerph192416534), 2022-12-09
Supplement: s1 [file s1]

[illegible]

| 8th Day<br>(Wednesday)                                        | 9th Day<br>(Thursday)                   | 10th Day<br>(Friday)                    | 11th Day<br>(Saturday)                  | 12th Day<br>(Sunday)           | 13th Day<br>(Monday)                    | 14th Day<br>(Tuesday)                   |                                       |                                   |                                   |
|---------------------------------------------------------------|-----------------------------------------|-----------------------------------------|-----------------------------------------|--------------------------------|-----------------------------------------|-----------------------------------------|---------------------------------------|-----------------------------------|-----------------------------------|
| 7.30 am – 8.00 am<br>Morning Activation                       | 7.30 am – 8.00 am<br>Morning Activation | 7.30 am – 8.00 am<br>Morning Activation | 7.30 am – 8.00 am<br>Morning Activation | 7.30 am – 8.00 am<br>Rest day  | 7.30 am – 8.00 am<br>Morning Activation | 7.30 am – 8.00 am<br>Morning Activation |                                       |                                   |                                   |
| 8.30 am – 9.30 am<br>Breakfast                                | 8.30 am – 9.30 am<br>Breakfast          | 8.30 am – 9.30 am<br>Breakfast          | 8.30 am – 9.30 am<br>Breakfast          | 8.30 am – 9.30 am<br>Breakfast | 8.30 am – 9.30 am<br>Breakfast          | 8.30 am – 9.30 am<br>Breakfast          |                                       |                                   |                                   |
| 9.30 am – 11.30 am<br>Exercise Program                        | 9.30 am – 11.30 am<br>Exercise Program  | 9.30 am – 11.30 am<br>Exercise Program  | 9.30 am – 11.30 am<br>Exercise Program  | 9.30 am – 11.30 am<br>Rest day | 9.30 am – 11.30 am<br>Exercise Program  | 9.30 am – 11.30 am<br>Exercise Program  |                                       |                                   |                                   |
| 12.00 pm – 1.00 pm<br>Lunch                                   | 12.00 pm – 1.00 pm<br>Lunch             | 12.00 pm – 1.00 pm<br>Lunch             | 12.00 pm – 1.00 pm<br>Lunch             | 12.00 pm – 1.00 pm<br>Lunch    | 12.00 pm – 1.00 pm<br>Lunch             | 12.00 pm – 1.00 pm<br>Lunch             |                                       |                                   |                                   |
| 1.00 pm – 2.00 pm<br>Leisure Time                             | 1.00 pm – 2.00 pm<br>Leisure Time       | 1.00 pm – 3.00 pm<br>Leisure Time       | 1.00 pm – 2.00 pm<br>Leisure Time       | 1.00 pm – 6.00 pm<br>Rest day  | 1.00 pm – 2.00 pm<br>Leisure Time       | 1.00 pm – 2.00 pm<br>Leisure Time       |                                       |                                   |                                   |
| 2.00 pm – 3.00 pm<br>Presentation “Health<br>behavior change” | 2.00 pm – 4.00 pm<br>Exercise Program   |                                         | 2.00 pm – 6.00 pm<br>Hiking Trip        |                                | 2.00 pm – 4.00 pm<br>Exercise Program   | 2.00 pm – 4.00 pm<br>Exercise Program   | 2.00 pm – 4.00 pm<br>Exercise Program |                                   |                                   |
| 3.00 pm – 6.00 pm<br>Leisure Time                             |                                         | 3.00 pm – 5.00 pm<br>Exercise Program   |                                         |                                |                                         |                                         |                                       | 4.00 pm – 6.00 pm<br>Leisure Time | 4.00 pm – 6.00 pm<br>Leisure Time |
|                                                               |                                         |                                         |                                         |                                |                                         |                                         |                                       |                                   |                                   |
| 6.00 pm – 7.00 pm<br>Dinner                                   | 6.00 pm – 7.00 pm<br>Dinner             | 6.00 pm – 7.00 pm<br>Dinner             | 6.00 pm – 7.00 pm<br>Dinner             |                                | 6.00 pm – 7.00 pm<br>Dinner             | 6.00 pm – 7.00 pm<br>Dinner             | 6.00 pm – 7.00 pm<br>Dinner           |                                   |                                   |
| From 7.00 pm<br>Leisure Time                                  | From 7.00 pm<br>Leisure Time            | From 7.00 pm<br>Leisure Time            | From 7.00 pm<br>Individual Coaching     | From 7.00 pm<br>Leisure Time   | From 7.00 pm<br>Individual Coaching     | From 7.00 pm<br>Individual Coaching     |                                       |                                   |                                   |

| 15th Day<br>(Wednesday)                                            | 16th Day<br>(Thursday)                  | 17th Day<br>(Friday)                      | 18th Day<br>(Saturday)                  | 19th Day<br>(Sunday)           | 20th Day<br>(Monday)                    | 21st Day<br>(Tuesday)                                      |                                       |                                                           |                                        |
|--------------------------------------------------------------------|-----------------------------------------|-------------------------------------------|-----------------------------------------|--------------------------------|-----------------------------------------|------------------------------------------------------------|---------------------------------------|-----------------------------------------------------------|----------------------------------------|
| 7.30 am – 8.00 am<br>Morning Activation                            | 7.30 am – 8.00 am<br>Morning Activation | 7.30 am – 8.00 am<br>Morning Activation   | 7.30 am – 8.00 am<br>Morning Activation | 7.30 am – 8.00 am<br>Rest day  | 7.30 am – 8.00 am<br>Morning Activation | 7.30 am – 8.00 am<br>Morning Activation                    |                                       |                                                           |                                        |
| 8.30 am – 9.30 am<br>Breakfast                                     | 8.30 am – 9.30 am<br>Breakfast          | 8.30 am – 9.30 am<br>Breakfast            | 8.30 am – 9.30 am<br>Breakfast          | 8.30 am – 9.30 am<br>Breakfast | 8.30 am – 9.30 am<br>Breakfast          | 8.30 am – 9.30 am<br>Breakfast                             |                                       |                                                           |                                        |
| 9.30 am – 11.30 am<br>Exercise Program                             | 9.30 am – 11.30 am<br>Exercise Program  | 9.30 am – 11.30 am<br>Exercise Program    | 9.30 am – 11.30 am<br>Exercise Program  | 9.30 am – 11.30 am<br>Rest day | 9.30 am – 11.30 am<br>Exercise Program  | 9.30 am – 11.30 am<br>Exercise Program                     |                                       |                                                           |                                        |
| 12.00 pm – 1.00 pm<br>Lunch                                        | 12.00 pm – 1.00 pm<br>Lunch             | 12.00 pm – 1.00 pm<br>Lunch               | 12.00 pm – 1.00 pm<br>Lunch             | 12.00 pm – 1.00 pm<br>Lunch    | 12.00 pm – 1.00 pm<br>Lunch             | 12.00 pm – 1.00 pm<br>Lunch                                |                                       |                                                           |                                        |
| 1.00 pm – 2.00 pm<br>Leisure Time                                  | 1.00 pm – 2.00 pm<br>Leisure Time       | 1.00 pm – 6.00 pm<br>Medical health check | 1.00 pm – 2.00 pm<br>Leisure Time       | 1.00 pm – 6.00 pm<br>Rest day  | 1.00 pm – 2.00 pm<br>Leisure Time       | 1.00 pm – 2.00 pm<br>Leisure Time                          |                                       |                                                           |                                        |
| 2.00 pm – 3.00 pm<br>Presentation “Health<br>behavior maintenance” | 2.00 pm – 4.00 pm<br>Exercise Program   |                                           | 2.00 pm – 6.00 pm<br>Hiking Trip        |                                | 2.00 pm – 6.00 pm<br>Rest day           | 2.00 pm – 6.00 pm<br>Implementation<br>strategies for home | 2.00 pm – 4.00 pm<br>Exercise Program |                                                           |                                        |
| 3.00 pm – 6.00 pm<br>Leisure Time                                  |                                         |                                           |                                         |                                |                                         |                                                            |                                       | 4.00 pm – 5.00 pm<br>Presentation “Barrier<br>management” | 4.00 pm – 6.00 pm<br>Official farewell |
|                                                                    |                                         |                                           |                                         |                                |                                         |                                                            |                                       | 5.00 pm – 6.00 pm<br>Leisure Time                         |                                        |
| 6.00 pm – 7.00 pm<br>Dinner                                        | 6.00 pm – 7.00 pm<br>Dinner             |                                           |                                         |                                |                                         |                                                            | 6.00 pm – 7.00 pm<br>Dinner           | 6.00 pm – 7.00 pm<br>Dinner                               | 6.00 pm – 7.00 pm<br>Dinner            |
| From 7.00 pm<br>Individual Coaching                                | From 7.00 pm<br>Individual Coaching     | From 7.00 pm<br>Individual Coaching       | From 7.00 pm<br>Individual Coaching     | From 7.00 pm<br>Leisure Time   | From 7.00 pm<br>Individual Coaching     | From 7.00 pm<br>Departure                                  |                                       |                                                           |                                        |
