# Supplementary material for: Food Literacy and Dietary Intake in German Office Workers: A Longitudinal Intervention Study
Source: MDPI journal article supplement (doi:10.3390/ijerph192416534), 2022-12-09
Supplement: s1 [file s1]

## Overview of Item Responses

| Food Literacy   | T0        | T1        | T2        | T3        |
|-----------------|-----------|-----------|-----------|-----------|
| SFLQ_01         | 3.2 (0.7) | 3.5 (0.5) | 3.6 (0.5) | 3.5 (0.6) |
| SFLQ_02_average | 3.7 (0.8) | 3.4 (0.5) | 3.9 (0.8) | 3.9 (0.8) |
| SFLQ_02a        | 3.8 (1.4) | 3.4 (0.9) | 4.2 (1.0) | 4.2 (0.9) |
| SFLQ_02b        | 3.3 (1.1) | 3.8 (0.9) | 3.6 (1.0) | 3.7 (1.1) |
| SFLQ_02c        | 3.7 (1.5) | 3.9 (1.1) | 3.8 (1.3) | 3.8 (1.3) |
| SFLQ_02d        | 4.1 (1.2) | 2.9 (1.1) | 4.1 (1.2) | 4.0 (1.3) |
| SFLQ_02e        | 3.8 (1.1) | 3.0 (1.1) | 4.0 (1.1) | 3.9 (1.1) |
| SFLQ_03         | 2.7 (1.5) | 3.7 (1.2) | 3.8 (1.0) | 3.8 (1.1) |
| SFLQ_04         | 2.4 (0.9) | 3.0 (0.7) | 3.1 (0.7) | 3.1 (0.7) |
| SFLQ_05         | 2.2 (0.8) | 2.8 (0.8) | 2.9 (0.8) | 2.9 (0.7) |
| SFLQ_06_average | 2.3 (0.8) | 2.8 (0.5) | 2.8 (0.7) | 2.6 (0.7) |
| SFLQ_06a        | 2.4 (0.9) | 3.0 (0.8) | 3.0 (0.8) | 2.8 (0.8) |
| SFLQ_06b        | 2.3 (1.0) | 2.6 (0.8) | 2.6 (0.8) | 2.5 (0.9) |
| SFLQ_07         | 2.3 (1.3) | 2.8 (0.8) | 2.9 (1.2) | 2.8 (1.2) |
| SFLQ_08         | 3.2 (1.1) | 4.1 (0.8) | 4.0 (0.9) | 3.9 (0.9) |
| SFLQ_09         | 2.4 (0.6) | 2.8 (0.7) | 2.9 (0.6) | 2.9 (0.7) |
| SFLQ_10         | 2.6 (0.7) | 3.0 (0.7) | 3.1 (0.7) | 3.0 (0.6) |
| SFLQ_11         | 2.9 (0.6) | 3.1 (0.6) | 3.2 (0.5) | 3.1 (0.5) |
| SFLQ_12         | 2.9 (0.7) | 3.3 (0.6) | 3.3 (0.5) | 3.2 (0.5) |

| Dietary Intake          | T0        | T1        | T2        | T3        |
|-------------------------|-----------|-----------|-----------|-----------|
| FFQ_01_Meat             | 1.1 (0.6) | 1.4 (0.6) | 1.3 (0.5) | 1.4 (0.6) |
| FFQ_02_Sausages         | 1.1 (0.5) | 1.1 (0.8) | 1.2 (0.6) | 1.3 (0.6) |
| FFQ_04_Fish             | 1.3 (0.8) | 1.8 (0.4) | 1.5 (0.7) | 1.6 (0.7) |
| FFQ_05_Potatoes         | 0.5 (0.5) | 0.3 (0.4) | 0.4 (0.5) | 0.4 (0.5) |
| FFQ_06_Pasta            | 0.4 (0.5) | 0.2 (0.4) | 0.3 (0.5) | 0.4 (0.5) |
| FFQ_07_Rice             | 0.1 (0.3) | 0.2 (0.4) | 0.2 (0.4) | 0.2 (0.4) |
| FFQ_08_Salad            | 1.1 (0.7) | 1.8 (0.5) | 1.2 (0.7) | 1.2 (0.7) |
| FFQ_09_Vegetables       | 0.8 (0.7) | 1.4 (0.7) | 1.0 (0.7) | 1.0 (0.7) |
| FFQ_10_Fruit            | 1.1 (0.8) | 1.5 (0.7) | 1.3 (0.8) | 1.3 (0.8) |
| FFQ_11_Chocolate        | 0.7 (0.7) | 1.8 (0.5) | 0.8 (0.7) | 0.7 (0.7) |
| FFQ_12_Cake             | 0.8 (0.7) | 1.8 (0.5) | 1.0 (0.6) | 0.8 (0.7) |
| FFQ_14_Salty snacks     | 1.1 (0.7) | 1.9 (0.4) | 1.3 (0.6) | 1.2 (0.7) |
| FFQ_16_Wholegrain bread | 0.9 (0.7) | 1.2 (0.8) | 0.9 (0.7) | 0.9 (0.7) |
| FFQ_17_Oats, Cereals    | 1.1 (0.8) | 1.4 (0.8) | 1.4 (0.8) | 1.3 (0.9) |
| FFQ_20_Eggs             | 1.6 (0.5) | 1.6 (0.6) | 1.6 (0.6) | 1.6 (0.6) |

**Note:** Values are presented as Mean (SD).
