# Supplementary material for: Food Literacy and Dietary Intake in German Office Workers: A Longitudinal Intervention Study
Source: Int J Environ Res Public Health. 2022 Dec 9;19(24):16534. doi: 10.3390/ijerph192416534 (PMC9779084; doi:10.3390/ijerph192416534)
Supplement: Supplementary file 1 [file ijerph-19-16534-s001.zip]

Archive with 4 entries (4 files):
- Document S1 Declaration of informed consent.pdf
- Document S2 Overview of item responses.pdf
- Document S3 Survey for the evaluation of the WHPP at Siemens.pdf
- Document S4 WHPP Schedule.pdf
